# Supplementary material for: Global update on the susceptibility of human influenza viruses to neuraminidase inhibitors, 2014–2015
Source: PubMed Central journal article supplement (PMC5357725; doi:10.1016/j.antiviral.2016.06.001), 2016-08
Supplement: mmc3.pdf [file mmc3.pdf]

**Resistant viruses**

**Reference viruses**

**Collection date**

**2015**

**2014**

**2013**
